# Supplementary material for: Amphibian population genetics in agricultural landscapes: does viniculture drive the population structuring of the European common frog (Rana temporaria)?
Source: PubMed Central journal article supplement (PMC5508807; doi:10.7717/peerj.3520), 2017-07-11
Supplement: peerj-05-3520-s001.pdf [file peerj-05-3520-s001.pdf]

## Appendix

### Amphibian population genetics in agricultural landscapes: Does viniculture drive the population structuring of the European common frog (*Rana temporaria*)?

Patrick P. Lenhardt, Carsten A. Brühl, Christop Leeb, Kathrin Theissingner

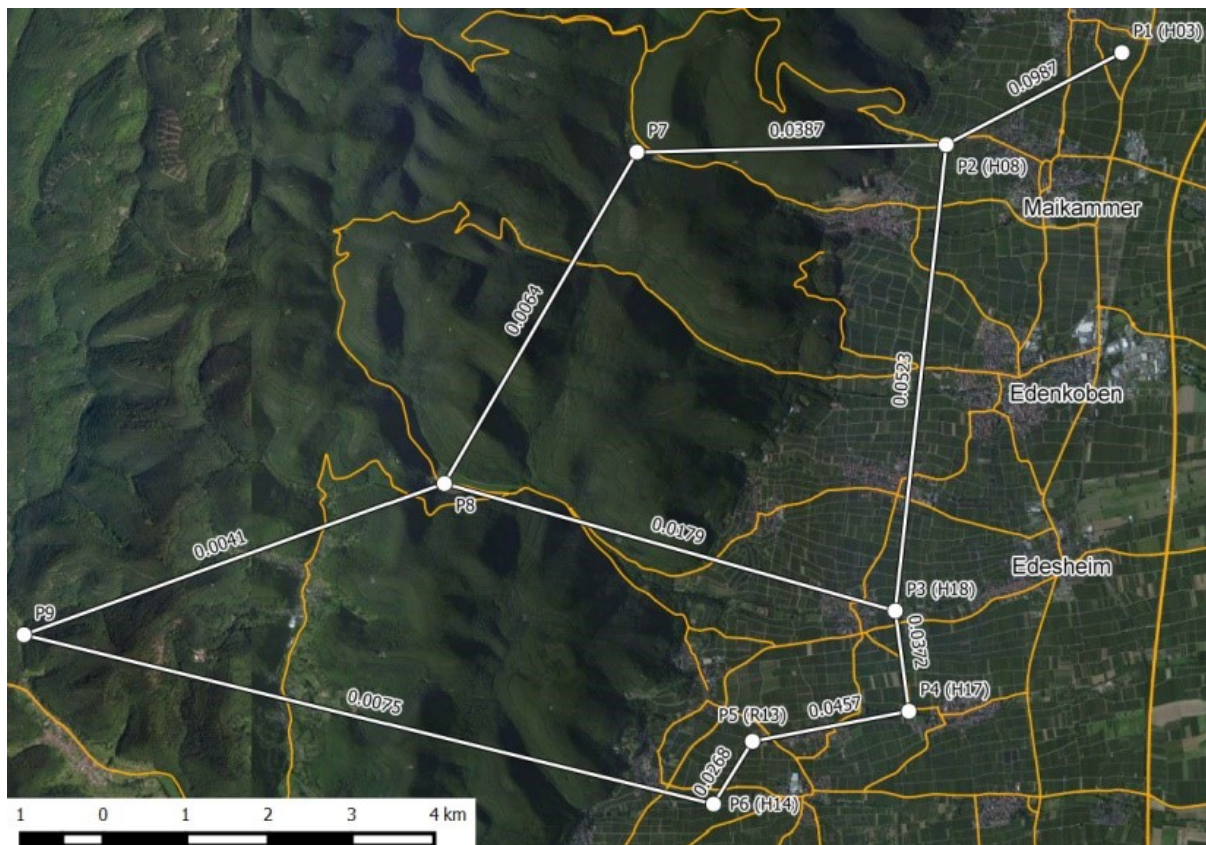

**Appendix Figure 1.** Aerial photo of the core study area between “Neustadt (an der Weinstraße)” (north of P1) and “Landau (in der Pfalz)” (south of P6) with selected median pairwise  $F_{ST}$  values. Relevant traffic infrastructure is highlighted in orange (aerial photo from Bing Maps, <http://www.bing.com/mapspreview>).

## Appendix

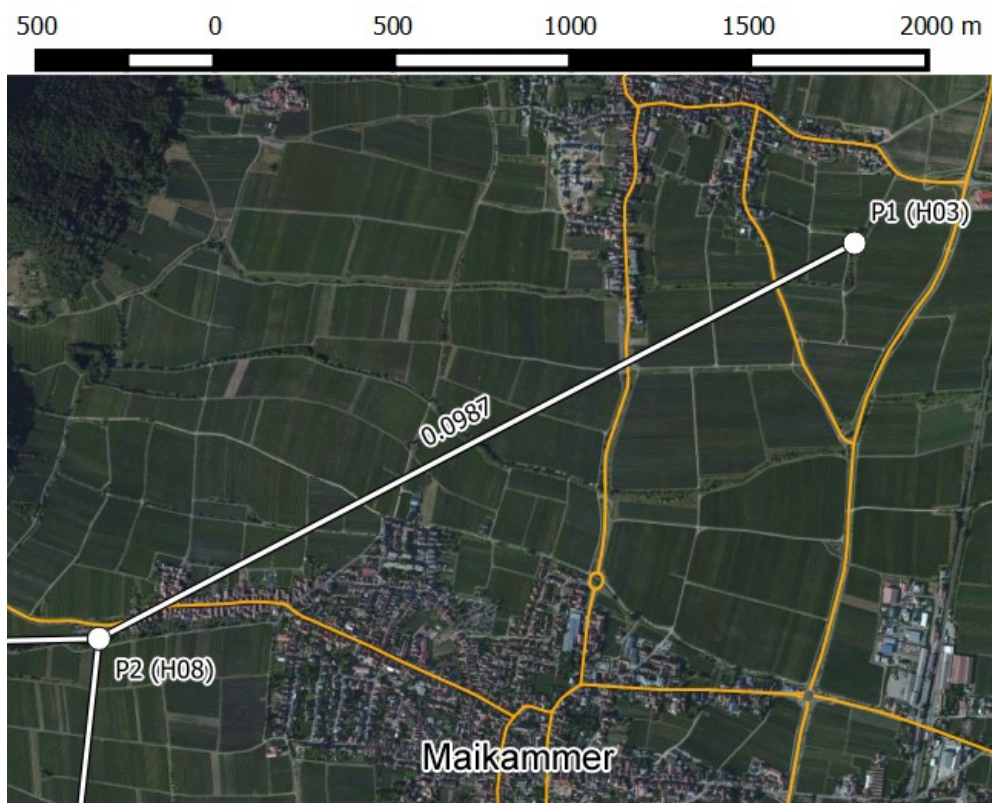

**Appendix Figure 2.** Close up aerial photo of landscape between breeding ponds P1 and P2 (2 394 m apart) in the north of the core study area with median pairwise  $F_{ST}$  value. Relevant traffic infrastructure is highlighted in orange (aerial photo from Bing Maps, <http://www.bing.com/mapspreview>).

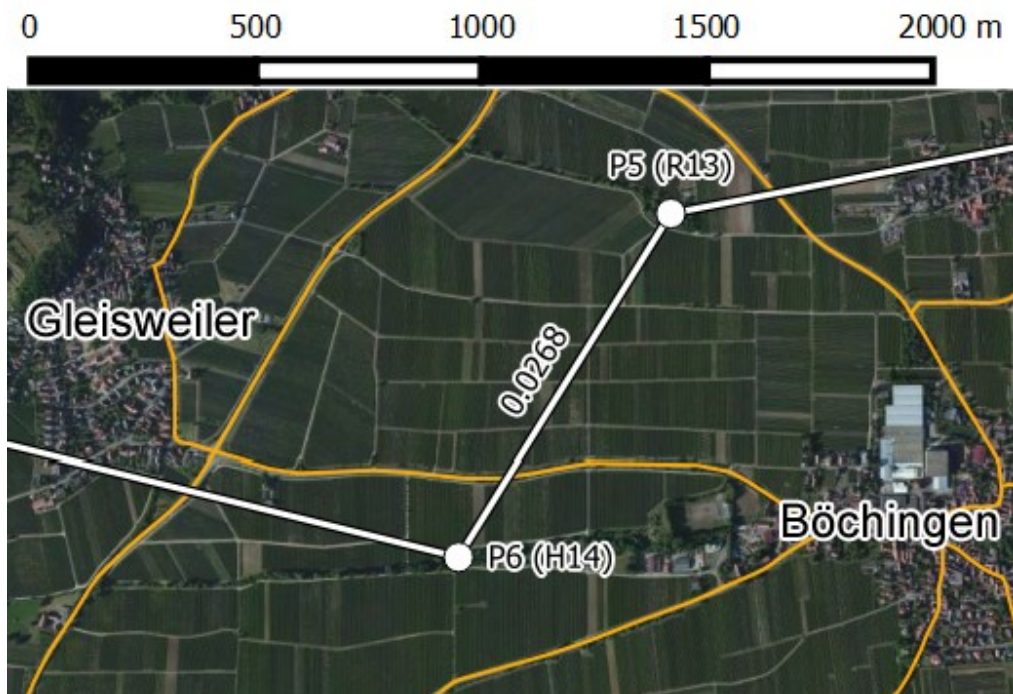

**Appendix Figure 3.** Close up aerial photo of landscape between breeding ponds P5 and P6 (890 m apart) with median pairwise  $F_{ST}$  value. Relevant traffic infrastructure is highlighted in orange (aerial photo from Bing Maps, <http://www.bing.com/mapspreview>).



Appendix

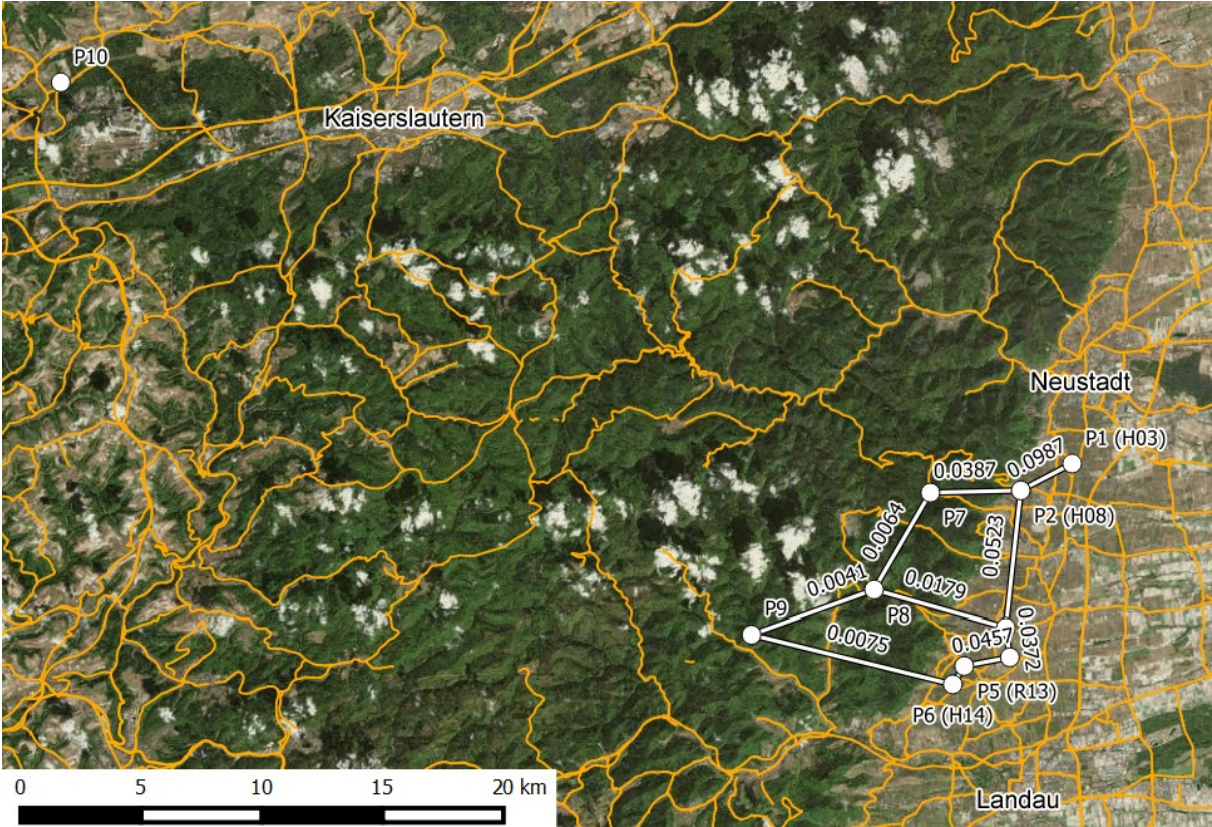

**Appendix Figure 4.** Aerial photo of the core study area between between “Neustadt (an der Weinstraße)” and “Landau (in der Pfalz)” with selected median pairwise  $F_{ST}$  values and P10 near Kaiserslautern. Relevant traffic infrastructure is highlighted in orange (aerial photo from Bing Maps, <http://www.bing.com/mapspreview>).

## Appendix

**Appendix Table 1.** Overview of all relevant roads in the study area. Traffic intensity (vehicles per 24 hours) were obtained from the Ministry of the Inner, Sports and Infrastructure in Rhineland-Palatinate (marked with an asterisk; Iris Honrath, personal communication) or estimated based on traffic intensity of nearby roads and geographical location.

| Road  | Type      | Traffic (in 24h) | Road  | Type         | Traffic (in 24h) |
|-------|-----------|------------------|-------|--------------|------------------|
| A 6   | motorway  | 62674 *          | K 15  | secondary    | 1500             |
| B 270 | primary   | 14280 *          | K 4   | tertiary     | 1500             |
| L 395 | secondary | 6000             | L 505 | secondary    | 1500             |
| L 502 | secondary | 6000             | L 507 | secondary    | 1456 *           |
| L 503 | secondary | 6259 *           | L 504 | secondary    | 1217 *           |
| L 369 | secondary | 6000             | K 57  | tertiary     | 1067 *           |
| L 356 | secondary | 6000             | K 40  | secondary    | 1000             |
| K 32  | tertiary  | 3148 *           | K 38  | tertiary     | 1000             |
| K 5   | secondary | 3000             | K 17  | tertiary     | 1000             |
| K 53  | tertiary  | 3000             | K 18  | tertiary     | 1000             |
| K 50  | tertiary  | 3000             | K 19  | tertiary     | 1000             |
| B 48  | primary   | 2934 *           | K 51  | unclassified | 1000             |
| L 506 | secondary | 2836 *           | K 30  | unclassified | 931              |
| L 514 | secondary | 2632 *           | K 31  | secondary    | 931              |
| L 499 | secondary | 2549 *           | K 6   | tertiary     | 931 *            |
| L 512 | secondary | 2500             | K 58  | tertiary     | 729 *            |
| L 500 | secondary | 2000             | K 59  | tertiary     | 729              |
| L 519 | secondary | 1955 *           | L 515 | secondary    | 645 *            |
| L 513 | secondary | 1553 *           | K 78  | unclassified | 586              |
| K 49  | tertiary  | 1500             | K 56  | tertiary     | 586 *            |
| K 55  | tertiary  | 1500             |       |              |                  |

## Appendix

**Appendix Table 2.** Number of roads between population pairs and their accumulated traffic intensity (vehicles in 24 hours on all roads between the pairs).

|                 |                               | P1     | P2     | P3     | P4     | P5     | P6     | P7     | P8     | P9     |
|-----------------|-------------------------------|--------|--------|--------|--------|--------|--------|--------|--------|--------|
| Number of roads | P2                            | 3      |        |        |        |        |        |        |        |        |
|                 | P3                            | 7      | 6      |        |        |        |        |        |        |        |
|                 | P4                            | 10     | 7      | 2      |        |        |        |        |        |        |
|                 | P5                            | 9      | 8      | 4      | 2      |        |        |        |        |        |
|                 | P6                            | 10     | 9      | 5      | 3      | 1      |        |        |        |        |
|                 | P7                            | 4      | 2      | 3      | 5      | 5      | 7      |        |        |        |
|                 | P8                            | 6      | 3      | 4      | 7      | 5      | 5      | 1      |        |        |
|                 | P9                            | 6      | 4      | 3      | 4      | 3      | 4      | 1      | 2      |        |
|                 | P10                           | 14     | 15     | 15     | 18     | 15     | 15     | 15     | 12     | 12     |
|                 | accumulated traffic intensity | P2     | 4645   |        |        |        |        |        |        |        |
| P3              |                               | 14192  | 12978  |        |        |        |        |        |        |        |
| P4              |                               | 17165  | 14089  | 2042   |        |        |        |        |        |        |
| P5              |                               | 16715  | 13730  | 5609   | 3567   |        |        |        |        |        |
| P6              |                               | 18268  | 15283  | 7162   | 5120   | 1553   |        |        |        |        |
| P7              |                               | 7277   | 3277   | 6267   | 8309   | 7019   | 10189  |        |        |        |
| P8              |                               | 9139   | 4208   | 6996   | 9767   | 8245   | 8731   | 931    |        |        |
| P9              |                               | 11044  | 7044   | 6065   | 7521   | 6247   | 7800   | 931    | 3767   |        |
| P10             |                               | 122690 | 123467 | 119481 | 124252 | 115788 | 116341 | 121691 | 109886 | 109955 |

## Appendix

**Appendix Table 3 Linkage of loci pairs with RRSg approach. Percentage values indicate the relative number of runs out of 100 000 calculations where linkage was detected (p-value less or equal to 0.05).**

| Loci pair       | Linkage detected out of 100 000 calculations [%] | Loci pair       | Linkage detected out of 100 000 calculations [%] |
|-----------------|--------------------------------------------------|-----------------|--------------------------------------------------|
| BFG130 & BFG092 | 0,04                                             | BFG130 & BFG066 | 0,00                                             |
| BFG090 & BFG129 | 0,72                                             | BFG130 & BFG099 | 0,00                                             |
| BFG090 & BFG145 | 0,87                                             | BFG130 & BFG151 | 0,00                                             |
| BFG090 & BFG082 | 0,34                                             | BFG130 & BFG160 | 0,00                                             |
| BFG090 & BFG099 | 0,00                                             | BFG066 & BFG090 | 0,96                                             |
| BFG090 & BFG160 | 0,08                                             | BFG066 & BFG129 | 0,64                                             |
| BFG145 & BFG129 | 0,78                                             | BFG066 & BFG145 | 0,18                                             |
| BFG082 & BFG129 | 0,40                                             | BFG066 & BFG082 | 0,00                                             |
| BFG082 & BFG145 | 0,65                                             | BFG066 & BFG099 | 0,02                                             |
| BFG082 & BFG099 | 0,00                                             | BFG066 & BFG151 | 0,00                                             |
| BFG082 & BFG160 | 0,01                                             | BFG066 & BFG160 | 0,04                                             |
| BFG092 & BFG090 | 0,74                                             | BFG099 & BFG129 | 0,05                                             |
| BFG092 & BFG129 | 0,70                                             | BFG099 & BFG145 | 0,04                                             |
| BFG092 & BFG145 | 0,69                                             | BFG099 & BFG160 | 0,00                                             |
| BFG092 & BFG082 | 0,42                                             | BFG151 & BFG090 | 0,59                                             |
| BFG092 & BFG066 | 0,24                                             | BFG151 & BFG129 | 0,57                                             |
| BFG092 & BFG099 | 0,00                                             | BFG151 & BFG145 | 0,81                                             |
| BFG092 & BFG151 | 0,74                                             | BFG151 & BFG082 | 0,18                                             |
| BFG092 & BFG160 | 0,13                                             | BFG151 & BFG099 | 0,22                                             |
| BFG130 & BFG090 | 0,00                                             | BFG151 & BFG160 | 0,12                                             |
| BFG130 & BFG129 | 0,13                                             | BFG160 & BFG129 | 0,59                                             |
| BFG130 & BFG145 | 0,19                                             | BFG160 & BFG145 | 0,30                                             |
| BFG130 & BFG082 | 0,02                                             |                 |                                                  |

## Appendix

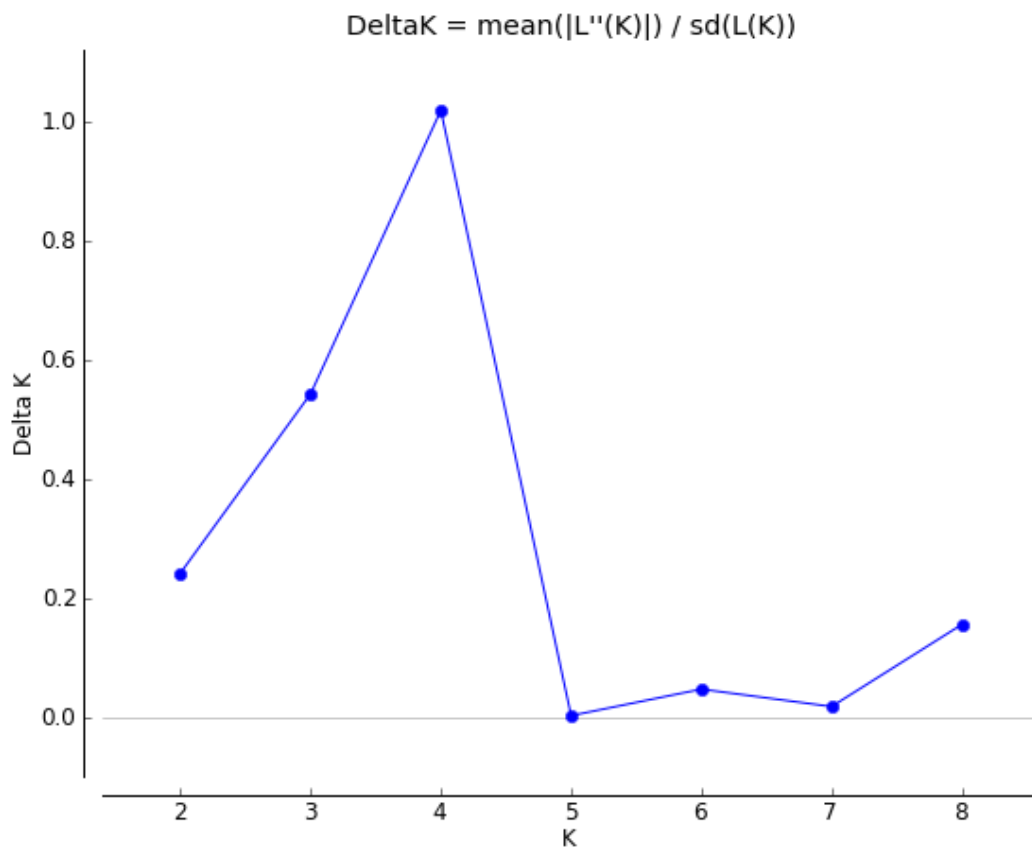

**Appendix Figure 5.** Plot of delta K values from the Structure analyses, obtained through STRUCTURE HARVESTER.

**Appendix Table 4** Evanno table output from the Structure analyses, obtained through STRUCTURE HARVESTER.

| K | Reps | Mean LnP(K) | Stdev LnP(K) | Ln'(K)      | Ln''(K)   | Delta K  |
|---|------|-------------|--------------|-------------|-----------|----------|
| 1 | 500  | -3327.7386  | 43.1840      | NA          | NA        | NA       |
| 2 | 500  | -3291.5598  | 49.5511      | 36.178800   | 12.029200 | 0.242764 |
| 3 | 500  | -3267.4102  | 56.2733      | 24.149600   | 30.581800 | 0.543451 |
| 4 | 500  | -3273.8424  | 86.4383      | -6.432200   | 88.074400 | 1.018928 |
| 5 | 500  | -3368.3490  | 139.3570     | -94.506600  | 0.514200  | 0.003690 |
| 6 | 500  | -3463.3698  | 172.8867     | -95.020800  | 8.314400  | 0.048092 |
| 7 | 500  | -3566.7050  | 205.5675     | -103.335200 | 3.897000  | 0.018957 |
| 8 | 500  | -3666.1432  | 309.9213     | -99.438200  | 48.534200 | 0.156602 |
| 9 | 500  | -3717.0472  | 337.7702     | -50.904000  | NA        | NA       |

**Appendix Table 5.** Linear geographical distance (LGD) in km between all population pairs.

## Appendix

|           |     | P1     | P2     | P3     | P4     | P5     | P6     | P7     | P8     | P9     |
|-----------|-----|--------|--------|--------|--------|--------|--------|--------|--------|--------|
| LGD in km | P2  | 2.394  |        |        |        |        |        |        |        |        |
|           | P3  | 7.254  | 5.644  |        |        |        |        |        |        |        |
|           | P4  | 8.334  | 6.834  | 1.220  |        |        |        |        |        |        |
|           | P5  | 9.415  | 7.553  | 2.335  | 1.926  |        |        |        |        |        |
|           | P6  | 10.303 | 8.420  | 3.200  | 2.614  | 0.890  |        |        |        |        |
|           | P7  | 5.979  | 3.737  | 6.342  | 7.489  | 7.227  | 7.901  |        |        |        |
|           | P8  | 9.689  | 7.306  | 5.662  | 6.250  | 4.849  | 5.049  | 4.616  |        |        |
|           | P9  | 14.992 | 12.598 | 10.526 | 10.728 | 8.890  | 8.573  | 9.403  | 5.387  |        |
|           | P10 | 44.563 | 43.008 | 44.974 | 45.732 | 44.321 | 44.346 | 39.639 | 39.512 | 36.423 |

**Appendix Table 6.** Clutch counts at the monitored amphibian breeding sites with presence of *Rana temporaria* during breeding seasons 2011 to 2014 (na = not available).

| Pop. | 2011  | 2012  | 2013  | 2014  |
|------|-------|-------|-------|-------|
| P1   | 8     | 7     | 7     | 0     |
| P2   | 10    | 12    | 0     | 8     |
| P3   | 9     | 11    | 8     | 0     |
| P4   | 19    | 22    | 18    | 0     |
| P5   | 7     | 8     | 0     | 0     |
| P6   | 8     | 8     | 5     | 0     |
| P7   | 26    | 32    | 27    | 24    |
| P8   | 21    | 25    | 19    | 18    |
| P9   | > 100 | > 100 | > 100 | > 100 |
| P10  | > 100 | na    | na    | na    |
